# Supplementary material for: Spatiotemporal Decoding of Tumor Contactome Unveils a Microbial-Sensitive Ctrb1-Dependent Cell Competition Architecture Driving Epithelial-Mesenchymal Defense Against Cancer
Source: Research Square preprint supplement (doi:10.21203/rs.3.rs-6524135/v1), 2025-05-07
Supplement: Supplementary file 1 [file d5e2daf66c09374c5c87ad75.docx]

**Supplementary Information**

**Spatiotemporal Decoding of Tumor** **Contactome Unveils A Microbial-Sensitive Ctrb1-Dependent Cell Competition Architecture Driving Epithelial-Mesenchymal Defense Against Cancer**

Zhangting Zhao, Fan Chen, Yan Meng, Hui Zhang, Mengwen Zhu, Yi Han, Xiaowei Wang, Zhifa Cao, Xinru Zhang, Meihang Du, Ziyuan Liu, Wenjia Wang, Shi Jiao, Liwei An, Zhaocai Zhou

**Supplementary Materials and Methods**

**Extended Data Fig. (1-7) and Legends**

**Supplementary Tables (1-5)**

**Supplementary Materials and Methods**

**Reagents**

Small molecule inhibitors Verteporfin (S80258, 10 mg/kg) and EN4 MYC inhibitor (S89228, 50 mg/kg) used in this study were purchased from Yuanye (Shanghai, China). 5-Fluorouracil (5-FU) (51-21-8, 4 mg/kg) were purchased from Sigma-Aldrich.

**Plasmids**

Overlap extension PCR was employed to efficiently fuse the two gene segments, Surface-TurboID and NES-PDGFR, creating a novel hybrid gene segment, Surface-TurboID-NES-PDGFR. For lentiviral constructs, Surface-TurboID-NES-PDGFR (amino acid residues 1-321), was integrated into the pLV-CMV-MCS-EF1-Puro vector. The CTRB1-Flag and CTRB1-Flag-P2A-GFP (amino acid residues 1-263) were cloned into pCDH-CMV-MCS-EF1-Puro vectors. Primers used in this study are provided in **Supplementary Table 2**.

**Transfection, lentivirus packaging, and infection**

For transfection, lentiviral particles were generated through a transient co-transfection of the lentiviral-based expression constructs with packaging plasmids psPAX2 and pMD2.G, using a mass ratio of 4:3:1, the lentiviral particles were then incubated with PEI at a mass ratio of 1:3 for 15 min at room temperature. Subsequently, they were dropwise added to the culture medium of HEK293FT cells. After 48 h from the initiation of this co-transfection procedure, the resulting supernatants were filtered (0.45 µm) and applied to recipient cell lines in the presence of 8 µg/ml polybrene (H9268, Sigma Aldrich).

**Co-culture cell system**

To investigate the function of CTRB1 in epithelial (GEC) and mesenchymal (3T3-L1) cells following interaction with tumors, we conducted both direct (co-culture) and indirect (transwell) experiments. For direct co-culture, GEC or 3T3-L1 cells were incubated with MFC cells (pre-stained with the cell proliferation marker eFluor™ 670) at a 1:1 ratio. The GEC and 3T3-L1 cells were then sorted via flow cytometry after 48 h co-culture for subsequent functional assays. For transwell assay, a 12-mm transwell system with a 0.4-µm pore polyester membrane insert (3450, Corning) was applied. GEC and 3T3-L1 cells were seeded in the lower chamber, while MFC cells were cultured in the upper chamber. After 48 h of incubation, the GEC and 3T3-L1 cells were harvested for downstream functional assays. The *Ctrb1* transcription in GEC and 3T3-L1 cells were examined by qPCR assays.

**Chromatin immunoprecipitation (ChIP) assay**

ChIP was performed as previously described(An et al., 2018). Briefly, GEC and 3T3-L1 cells co-cultured with tumor cell line MFC were harvested. The cells were cross-linked with freshly prepared formaldehyde (final concentration 1.42%) for 15 min, after which glycine (125 mM) was added to quench the reaction, and the mixture was incubated for 5 min at room temperature. The cells were then washed twice with cold PBS, centrifuged, and collected by scraping. The resulting cell pellets were resuspended in 400 μl of ChIP lysis buffer (50 mM HEPES/KOH, pH 7.5; 140 mM NaCl; 1 mM EDTA; 1% Triton X-100; 0.1% sodium deoxycholate; and protease inhibitors) and subjected to chromatin shearing using a Bioruptor sonicator at high power for 15 cycles (30 s on and 30 s off per cycle). Following sonication, the lysates were diluted twofold with lysis buffer and centrifuged to clear the supernatant. For whole-cell input DNA extraction, 80 μl (10%) of the supernatant was reserved. The remaining supernatant was transferred to fresh Eppendorf tubes and incubated overnight at 4 °C with IgG or specific antibodies, including anti-Myc (ab32072, Abcam) and anti-TEAD4 (ab308621, Abcam). Prewashed protein A/G beads (L2118, Santa Cruz) were added to the samples, followed by incubation for 3 h. After incubation, the samples were washed five times with ChIP lysis buffer and resuspended in 100 μl of 10% Chelex (1421253, Bio-Rad). The suspensions were boiled for 10 min, centrifuged briefly at 4 °C, and the supernatants were transferred to new tubes. An additional 120 μl of MilliQ water was added to the bead pellet, vortexed for 10 s, and centrifuged. The supernatants were combined and used as templates for subsequent qPCR analysis. The primers utilized are listed in **Supplementary Table 3**.

**Immunoprecipitation and western blotting**

For immunoblotting assays, cells were lysed with NETN buffer (20 mM Tris-HCl, pH 8.0, 100 mM NaCl, 0.5% NP-40, and 1 mM EDTA), supplemented with micrococcal nuclease (1:5000, M0247S, NEB) on ice for 30 min. Cell lysates were then boiled with 5× SDS loading buffer, and their components were separated using SDS-PAGE, transferred to PVDF (polyvinylidene fluoride) membranes (Bio-Rad), and immunoblotted with indicated antibodies. The antibodies used, along with their dilutions, were TurboID (AS20 4440, Agrisera, 1:1000), Peroxidase-conjugated Streptavidin (#35105ES6, Yeasen, 1:2000), Flag (F3165, Sigma, 1:2000), and β-actin (#A5441, Sigma, 1:5000). The secondary HRP antibodies, including goat anti-rabbit (31460, 1:5000) and goat anti-mouse (31430, 1:5000), were purchased from Thermo Fisher Scientific. Western blotting images were captured using a Tanon™ 5200CE Chemi-Image System (5200CE) (Tanon, Shanghai). The antibodies used are described in **Supplementary Table S4**.

For immunoprecipitation experiments, cells were lysed and subjected to centrifugation at 12,000 rpm for 10 min at 4 °C. Resulting supernatants were then transferred into a new Eppendorf tube and incubated with Flag beads (L00425, GenScript) for 4 h at 4 °C with rotation (50 rpm). These beads were subsequently washed three times with NETN buffer and boiled with 1 × SDS loading buffer. To avoid the noise of light/heavy chains, secondary antibodies including mouse anti-rabbit IgG LCS (A25022, 1:5000) and goat anti-mouse IgG LCS (A25012, 1:5000), obtained from Abbkine (Wuhan, China), were used for the immunoprecipitation assays.

**4D label-free proteomics analysis**

For 4D label-free protein quantification, proteins were extracted from HEK293FT-3xFlag and HEK293FT-CTRB1-Flagcells through co-immunoprecipitation with Flag beads (L00425, GenScript). Subsequent protein quantification based on a 4D label-free analysis was conducted by PTM Biolabs (Hangzhou). LC-MS/MS analysis was conducted using a NanoElute UPLC system coupled with a timsTOF Pro mass spectrometer. Median-normalized peptide expression was calculated using the equation NR*ij* = R*ij* / median (Ri) (with *i* indicating the sample, and *j* indicating peptide), and protein relative expression was calculated using the equation Rik = median (NR*ij*, *j∈k*) (with *k* indicating the protein, and *j* indicating a unique peptide of the protein). The sequencing data reported in this paper were deposited in the iProX database under accession number IPX0010977000.

**Flow cytometry**

For surface markers, single-cell suspensions were first blocked with cell surface antibodies CD45, CD31, CD326, CD4, and CD8 in FACS buffer (1 × PBS containing 2% FBS and 2 mM EDTA) for 20 minutes at 4°C. For intracellular cytokine staining, the cells were fixed and permeabilized for 30 min using the Fixation/Permeabilization Kit (Thermo Fisher Scientific, L34959) for further intracellular Biotin staining. Flow cytometry acquisition was performed using a 4-laser BD LSRFortessaTM (BD Bioscience) apparatus with FACSDivaTM software. The cells were gated based on the forward scatter area (FSC-A) and side scatter area (SSC-A) followed by exclusion of doublets with forward scatter height (FSC-H) and forward scatter width (FSC-W). Dead cells were excluded with DAPI (Sigma, D9542) or LIVE/DEAD yellow (Thermo Fisher Scientific, L34959 ). Data were subsequently analyzed with FlowJo software (Tree Star). Cells were gated by applying the following procedure: Fibroblasts, Live/Dead− CD45-(S18009F) CD31-(W18222B) CD326- (G8.8) Biotin+(S21383); CD4 cells, Live/Dead− CD45-(S18009F) CD4+(GK1.5) Biotin+(S21383); CD8 cells, Live/Dead− CD45-(S18009F) CD8+(53-6.7) Biotin+(S21383). Flow cytometry stock antibodies were diluted at a ratio of 1:200. The antibodies used are described in **Supplementary Table S4**.

**RNA extraction, reverse transcription, and qPCR**

Total RNA was extracted using the RNA isolater Total RNA Extraction Reagent (R401-01-AA, Vazyme). Subsequently, cDNA was reverse transcribed from the RNA (1 μg) using the HiScript II Q Select RT SuperMix (Vazyme) following the manufacturer's instructions. Quantitative real-time PCR (RT-qPCR) was performed using SYBR Green reagents on a Step One Plus system (Applied Biosystems). β-actin was used as the internal control. Primers used in this study are provided in **Supplementary Table 5.**

**RNA sequencing**

Total RNA was extracted from 293FT-P2A-GFP (293FTGFP) and 293FT-CTRB1-Flag-P2A-GFP (293FTGFP-CTRB1) cells at least three biological replicates. Subsequently, 500 ng of total RNA from each sample was sequenced using the Illumina NovaSeq 6000 platform at Azenta Life Sciences (APExBIO, Shanghai, China). The generated sequence data was then analyzed using the hg19 genome database.

**Establishment of a mouse orthotopic gastric cancer model for cell competition and tumor clearance**

Healthy 615 mice were sourced from Hangzhou Ziyuan Company (Hangzhou, China). For the tumor formation assay, MFCSTCL cells (4 × 106) were orthotopically injected into the gastric submucosa-muscularis layer of each experimental mouse. Mice were sacrificed day 5, day 10, and day 15 post-tumor cell injection (n= 6/group). We systematically evaluated the labeling efficiency of biotin by testing various concentrations, administration timings, and delivery methods. Our findings revealed that intraperitoneal injection of biotin at doses of both 5 mg/kg and 1 mg/kg yielded comparable labeling efficiencies over a period of 3 to 10 days. Notably, the optimal labeling effect was observed at the 5-day mark. In contrast, achieving a similar level of labeling efficiency through oral administration required a longer duration of seven days when using a 5 µM concentration of biotin. Finally, Biotin (1 mg/mL, 100 μL/animal) was administered intraperitoneally once daily for five days prior to sampling, and tumor volumes were calculated using the formula: Tumor volumes =width^2 × length × 0.52 (mm3). Biotin used in this study were purchased from Sigma-Aldrich (Shanghai, China).

We first generated an orthotopic tumor-suppressive mouse model by injection of a gastric tumor cell line MFC (GFP-labeled) into the cavity between submucosa and muscularis of stomach, in which the cell competition between tumor and host could allow tumor growth at the early stage (day 5 and day 10) and then the tumor would be eradicated by the host at the late stage (day 15) (**Extended Data Fig. 1a**).

**Lineage tracing**

To further characterize the cellular origin of PCL, we employed an inducible reporter strategy to genetically trace epithelial cells or fibroblasts in the stomach of mice bearing MFC-derived tumors. To this end, we first crossed the reporter mice *Rosa26-LSL-RFP* (hereafter referred as *R26RFP*) with *Claudin18.2Cre/ERT2* mice (*Claudin18.2Cre/ERT2;R26RFP*) and *Col12aCre/ERT2* mice (*Col12aCre/ERT2;R26RFP*) to allow tamoxifen-dependent expression of RFP in gastric epithelial cells and smooth muscle fibroblast cells, and then subjected these mice to MFC cells-derived orthotopic tumor formation. Similarly, we also traced αSMA+fibroblasts by generating *αSMACre;R26RFP* mice.

**Virus injection**

AAV-ZsGRreen and AAV-CMVCre-ZsGreen viral solutions were purchased from Hanbio (Shanghai, China). *Ctrb1F/F* mice were first anesthetized with 1% isoflurane. Subsequently, approximately 60 μL of viral solution (1.5 × 10¹² copies/mL) was injected into the gastric submucosa-muscularis layer of each mouse. After recovering from anesthesia, the animals were returned to their home cages.

**Indirect immunofluorescence assay (IFA)**

For immunofluorescence assay, cells were seeded in confocal dishes (NEST, 801001) for attachment, following incubation with WGA (W11261, Sigma, 1:400). Then cells were fixed with 4% formaldehyde for 15 min. After permeabilization with 0.1% Triton X-100, the cells were blocked with 3% BSA in a solution of 0.01% Tween-20 in PBS (PBST) for 1 h and subsequently incubated with primary antibodies against TurboID (AS20 4440, Agrisera AB, 1:200), CTRB1 (Sc-398721, Santa cruz, 1:200) overnight at 4°C. Following incubation with Alexa Fluor® 594 Streptavidin (405240, Biolegend, 1:400), Goat anti-Mouse IgG (H+L) Cross-Adsorbed Secondary Antibody, Alexa Fluor™ 568 (A-11004, Thermo, 1:400) and Goat anti-Rabbit IgG (H+L) Highly Cross-Adsorbed Secondary Antibody, Alexa Fluor™ 488 (A-11008, Thermo, 1:400), cell images were captured using an Olympus FV3000 confocal microscope (Tokyo, Japan) with 60×oil immersion lens. DAPI (Sigma, D9542, 1:2000) was used to stain nuclear DNA.

**Immunofluorescence and immunohistochemical assay**

The stomachs were flushed with cold PBS, followed by fixing in PBS containing 4% paraformaldehyde (PFA, WellBio). Paraffin-embedded sections (3 μm-thick) were generated following a general protocol (An et al., 2020; Jiao et al., 2014; Tang et al., 2020; Zhang et al., 2021). And cryosections (7 μm-thick) were generated from O.C.T.-embedded specimens according to a conventional method. The sections were stained blocking with 5% BSA at room temperature for 1 h, and then incubated sequentially with primary antibodies and secondary fluorophore-conjugated antibodies. DAPI (D9542, Sigma-Aldrich, 1:1000) was used to stain nuclear DNA. Images were captured using laser confocal scanning microscopes equipped with either Olympus FV3000 (Olympus, Tokyo, Japan) 60× NA 1.36 oil immersion objective, or Zeiss 880 (Zeiss, Jena, Germany) 10× objective and 63× NA 1.4 oil immersion objective. Four lasers were used with wavelengths of 405, 488, 568, and 647 nm. Images were processed by using Imaris software and ImageJ software. For detailed histologic analysis, sections were stained with Hematoxylin and Eosin (H&E, Solarbio, Beijing, China) or periodic acid–Schiff(Coluccia et al., 2007), and analyzed with the aid of an Olympus BX53 dissecting microscope (Olympus, Tokyo, Japan).

**Calculating the Pearson Correlation Coefficient in Image Analysis**

Pearson Correlation Coefficient (PCC) is used to measure the linear correlation between two variables. In the Colocalization Finder plugin of ImageJ, PCC is applied to assess the colocalization of signals between two fluorescence channels. **Single-cell dissociation, single-cell RNA library preparation and sequencing**

Samples were washed with phosphate-buffered saline (PBS), minced into approximately 1 mm3 pieces on ice and enzymatically digested with advanced DMEM/F12 containing 1 mg/ml Collagenase II (Sigma-Aldrich), 0.2 mM EDTA, and 0.5 mg/ml DNase I (Roche) for 7 min at 37 °C with agitation and repeat twice. After digestion, samples were sieved through a 70 µm cell strainer and centrifuged at 300 g for 5 min. Subsequently, cell suspensions were incubated with anti-biotin beads and separated using autoMACS Pro Separator (Miltenyi Biotec, Germany) for cell sorting (MACS). Thereafter, the samples were filtered through 70 µm cell strainer and centrifuged at 300 g for 5 min. Following removal of the supernatant, the pelleted cells were suspended in PBS containing 0.04% BSA and filtered through a 35 μm cell strainer. The single-cell suspension was further enriched using the EasySepTM Dead Cell Removal (Annexin V) Kit (STEMCELL Technologies, Canada). Single-cell RNA sequencing (scRNA-Seq) libraries were meticulously prepared using the 10× Genomics Chromium Controller Instrument and Chromium Single Cell 3’ V3 Reagent Kits (Pleasanton, CA). Sequencing of all libraries was carried out on a HiSeq Xten platform (Illumina, San Diego, CA) employing a 150 bp paired-end run(Xie et al., 2020).

**scRNA-seq data processing**

Single-cell RNA sequencing (scRNA-seq) data from all samples were normalized using the Seurat package (version 4.0) in R (version 4.4.3). Genes expressed in fewer than three cells per sample were excluded, as were cells expressing fewer than 500 genes or exhibiting mitochondrial gene content exceeding 25% of the total unique molecular identifier (UMI) count. Normalization was performed by scaling the total transcript count for each cell to 10,000. Highly variable genes were identified based on specific criteria: average expression values between 0.05 and 3, and dispersion values greater than 0.5. These genes were then scaled (subtracting their average expression) and centered (dividing by their standard deviation). The selected variable genes, essential for capturing cell-to-cell variability, were used for principal component analysis (PCA)(Xie et al., 2020). Finally, the first 25 principal components, determined by their eigenvalues, were utilized for UMAP analysis.

Identification of cell types: We analyzed the transcriptomic data derived from the expression profiles of all the single cells. Variable gene selection was executed based on criteria encompassing average expression (ranging from 0.05 to 3) and gene dispersion (above 0.5). Employing UMAP analysis, distinct subclusters were discerned, guided by well-established cell lineage-specific marker genes(Meng et al., 2023).

CNV estimation: Cells classified as endothelial, fibroblastic, or macrophagic were used as reference points to identify somatic copy number variations (CNVs) using the R package infercnv (v0.8.2)(Ma et al., 2019; Meng et al., 2022). Each cell was evaluated based on the extent of its CNV signal, quantified as the mean squared value of CNV across the genome. Cells with a CNV signal greater than 0.05 and a CNV correlation above 0.5 were designated as putative malignant cells.

Constructing single-cell trajectories: We constructed individual single-cell trajectories for each fibroblast using the reversed graph embedding method implemented in the R package Monocle (version 2.6.3)(Ma et al., 2019). The trajectory construction process consisted of two main steps. First, we identified key genes critical for shaping the trajectory and extracted relevant information. In the second step, we performed dimensionality reduction and trajectory construction using these selected genes. The reversed graph embedding method was then applied to project cells into a low-dimensional space while simultaneously learning a smooth, tree-like manifold.

**Microarray-based spatial transcriptomic**

Tissue permeabilization and spatial transcriptomic sequencing were conducted using 10×Visium Spatial Gene Expression Slides and Reagent Kits. The final libraries' size distribution was determined using a high-sensitivity DNA chip on a Bioanalyzer 2200 (Agilent) after quantification with the Qubit High-Sensitivity DNA Assay (Thermo Fisher Scientific). All libraries were sequenced on an Illumina platform (Illumina) with a 150 bp paired-end run.

**Spatial transcriptomic sequencing data processing**

The Seurat package (version 3.2, https://satijalab.org/seurat/) was used for spot normalization and regression. The fastMNN function from the R package scran (version 1.10.2) was applied to correct for batch effects across samples using the mutual nearest neighbor method(Haghverdi et al., 2018). PCA was performed on scaled data with all highly variable genes, and the top 30 principal components were used for constructing the Uniform Manifold Approximation and Projection (UMAP). Using a graph-based clustering method, unsupervised cell clusters were identified based on the top 30 principal components from PCA. Marker genes were then calculated using the FindAllMarkers function with the Wilcoxon rank-sum test, under the following criteria: (1) lnFC > 0.25, (2) P value < 0.05, and (3) min.pct > 0.1. Spatial feature expression plots were generated using the SpatialFeaturePlot function in Seurat (version 3.1.3) and the STUtility R package (version 1.0.0).

ssGSEA: We applied gene set enrichment analysis based on single cell-specific gene sets and normalized gene expression matrix by ssGSEA function in the GSVA package to achieve the gene enrichment score of each spot73.

**Microbiota infection**

6-8-week-old male 615 mice were orally gavaged with *Streptococcus anginosus* (*s.a.*) and *Candida albicans* (*c.a.*) during their logarithmic growth phase. Each mouse received 1 OD (100 μL) of the bacterial or fungal suspension. Gavage was performed twice a week for 3 weeks. After the conclusion of the treatment, MFFSTCL cells orthotopically implanted into the stomachs of mice.

**Extended Data Fig. (1-7) and Legends**


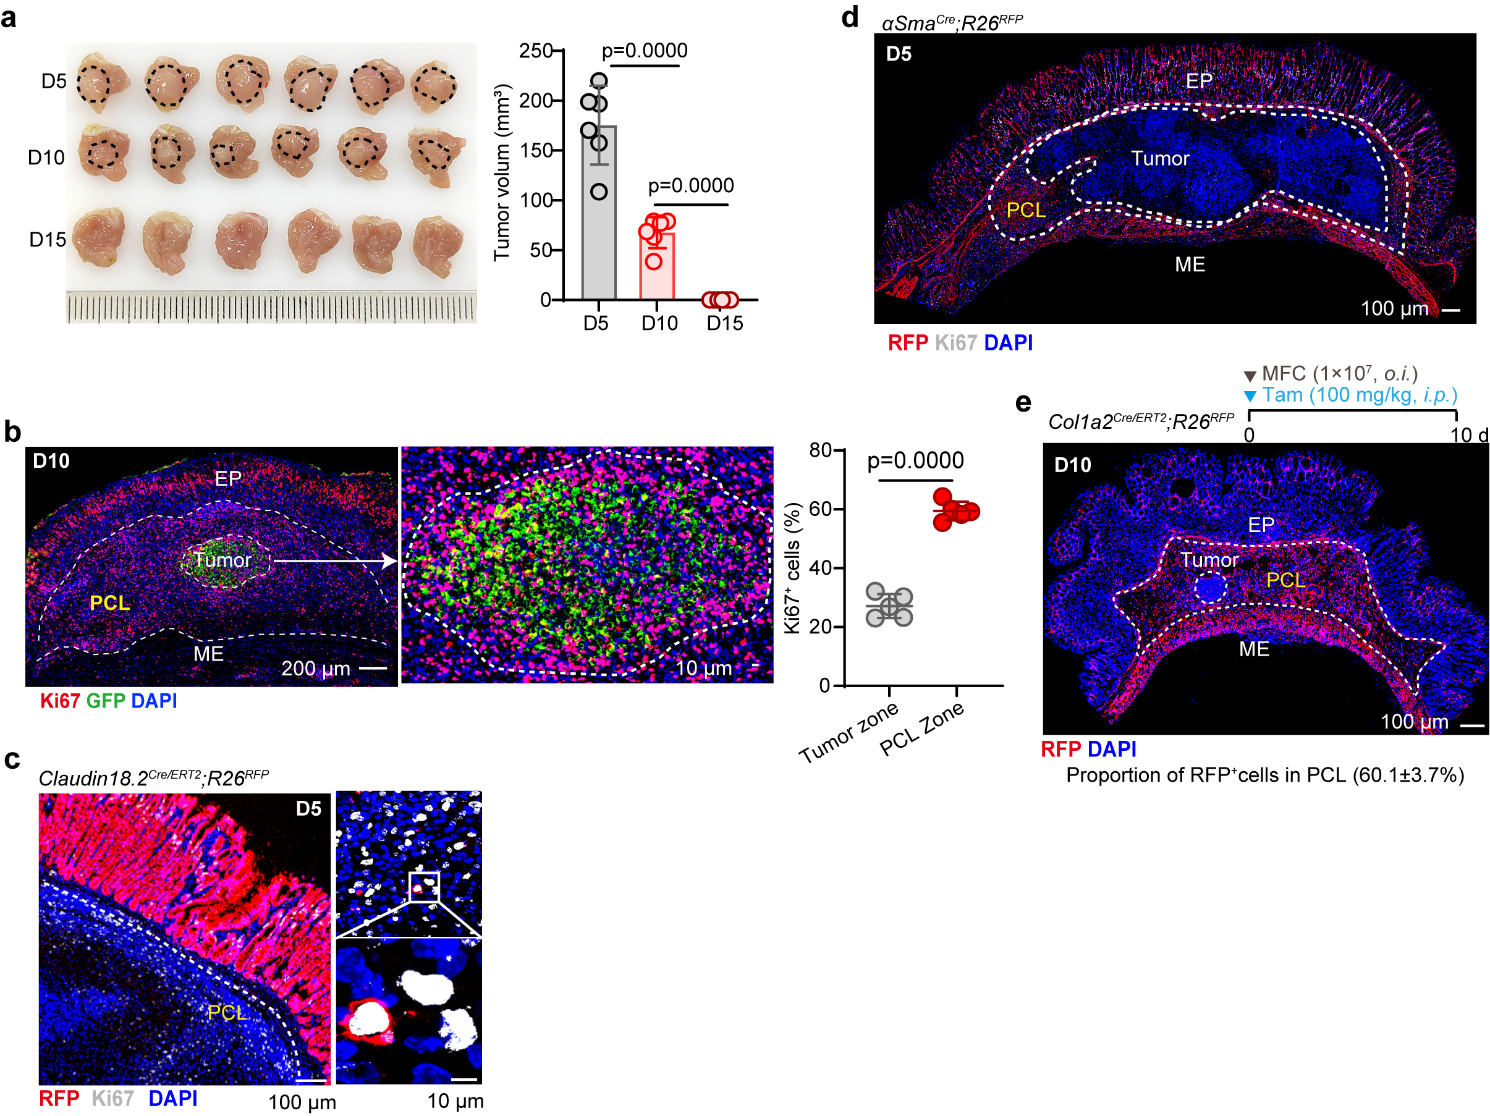


**Extended Data** **Fig. 1. Characterization of the PCL Structure and Cellular Composition**

**a**, Orthotopic tumor formation at D5, D10, and D15 post MFC injection in this tumor-suppressive GC mouse model. Tumor volumes were quantified (right panel) (n = 6 mice per group).

**b**, Representative images show Ki67+ PCL cells progressively infiltrating the tumor core, along with the percentage of Ki67+ cells in PCL and tumor zone at D10 (n = 5 per group). Scale bars, 200 μm and 10 μm.

**c**, Immunostaining of Ki67 expression in stomach tissue with RFP in the orthotopic gastric cancer (*o.c.*) model of *Claudin18.2Cre/ERT2;R26RFP* mice at day 5. Scale bars, 100 μm and 10 μm.

**d**, Immunostaining of Ki67 in whole-stomach tissue with RFP in the *o.c.* model of *αSmaCre;R26RFP* mice at day 5. Scale bar, 100 μm.

**e**, Immunostaining of Ki67 in whole-stomach tissue with RFP in the *o.c.* model of *Col1a2Cre/ERT2;R26RFP* mice at D10. The proportion of RFP+ cells in PCL in the *o.c.* were 60.1 ± 3.7 % of *Col1a2Cre/ERT2;R26RFP* mice. Scale bar, 100 μm.

Statistical Analysis: Data are presented as mean ± s.d. Significant differences were determined using two tailed, one-way ANOVA with Dunnett’s post hoc analysis (a).


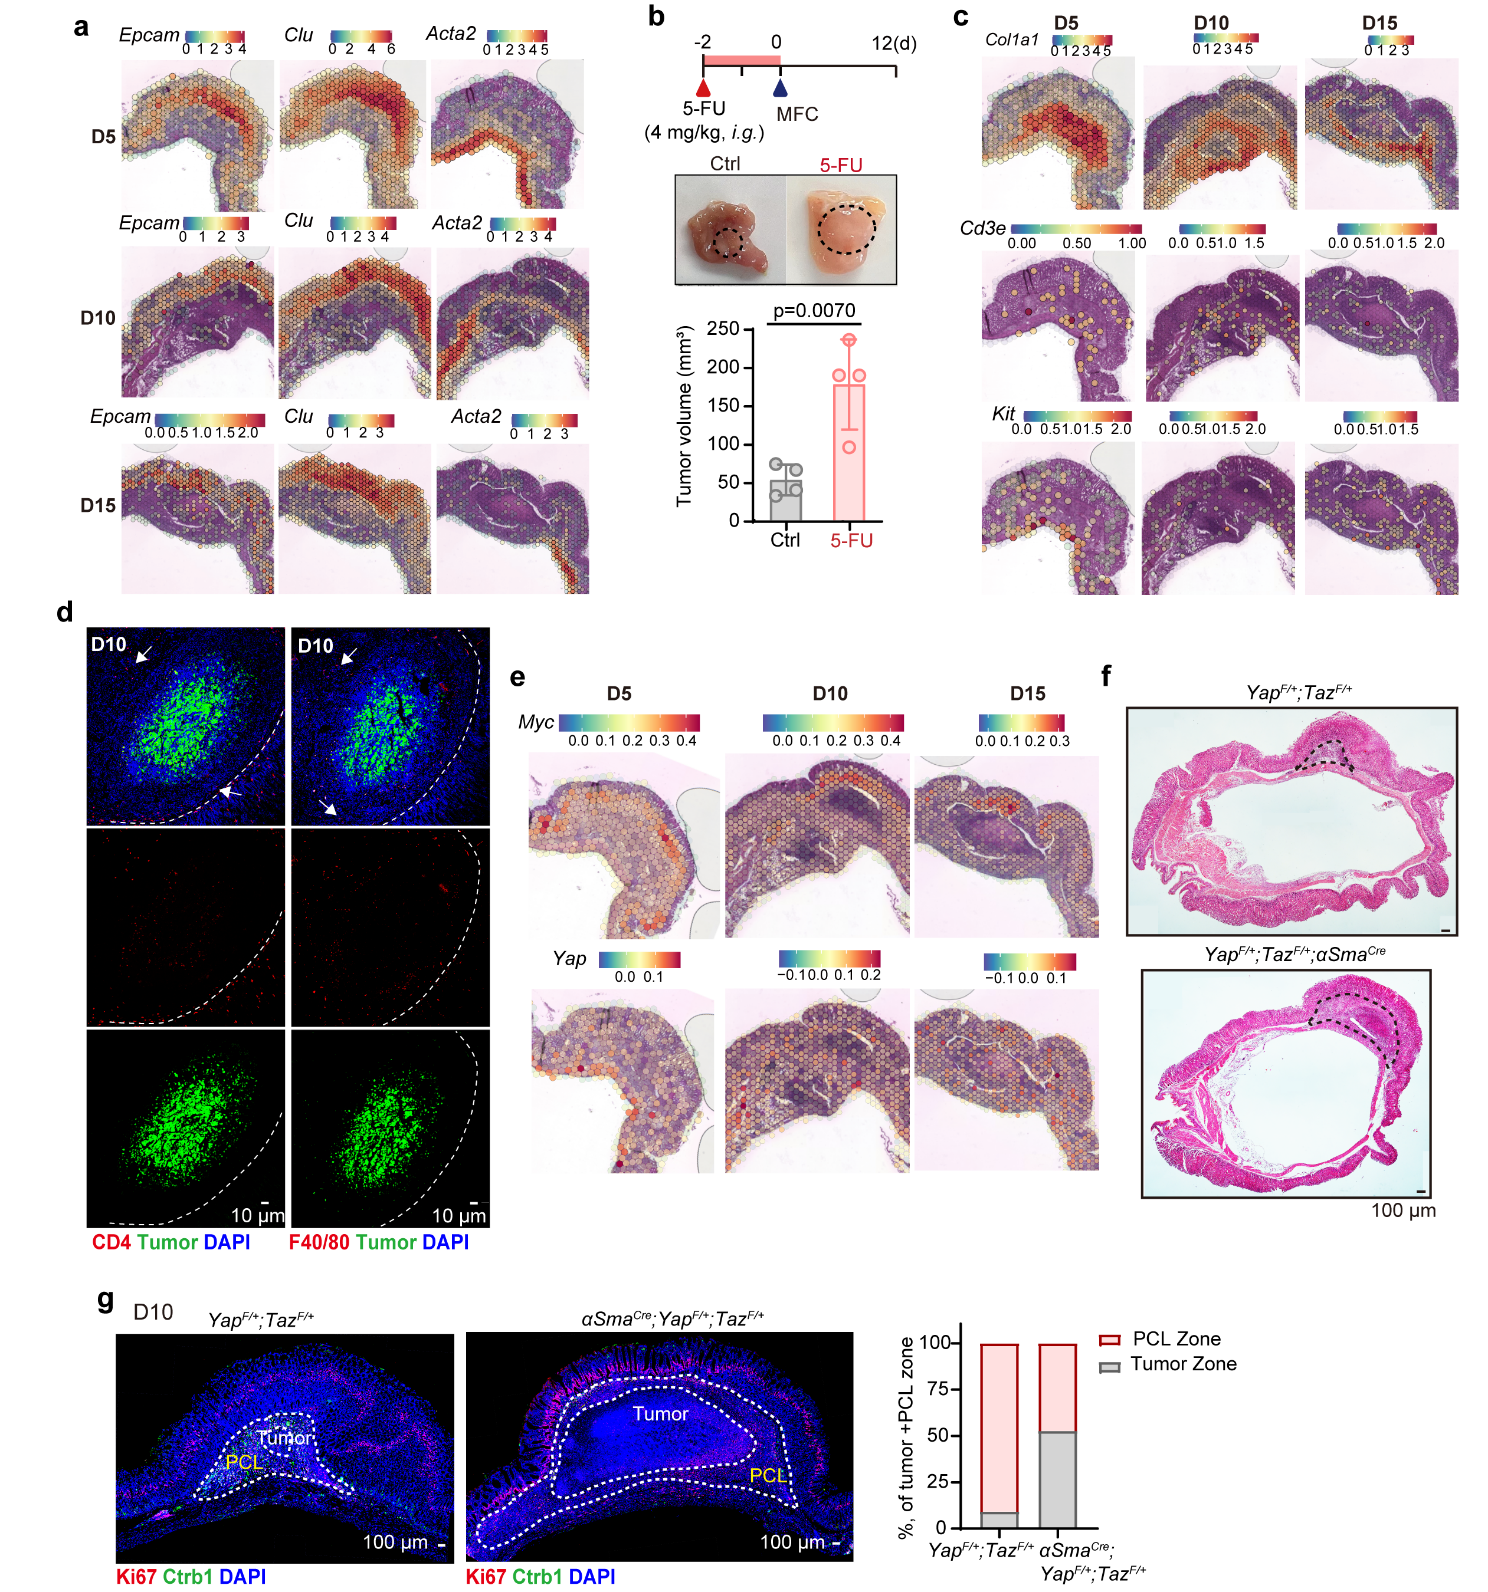


**Extended Data Fig. 2. Spatial Transcriptomics Uncover Coordinated MycEP and YapME Signaling Essential for EMDAC**

**a.** Unsupervised clustering at three-time intervals. Left: spatial *Epcam* expression. Middle: spatial *Clu* expression. Right: spatial *Acta2* expression.

**b**. 615 mice were pre-treated with 5-FU via intraperitoneal administration 2 days before subjecting to MFC orthotopic tumor assay. Tumors were allowed to grow for 12 days. Tumor volumes were quantified (n = 4 mice per group).

**c.** Unsupervised clustering at three-time intervals. Upper: spatial *Col1a1* expression. Middle: spatial *Cd3e* expression. Lower: spatial *Kit* expression.

**d**. Co-immunostaining of CD4 and F40/80 cells with tumor cells at D10. Scale bars, 10 μm.

**e.** Unsupervised Myc and Hippo pathways at three-time intervals.

**f.** H&E staining showing the GC tumors from *YapF/+;TazF/+* and *αSmaCre;YapF/+;TazF/+* mice. Scale bar, 100 μm.

**g**, Immunostaining of Ki67 expression in whole-stomach tissue with Ctrb1 in the *o.c.* model of *αSmaCre;YapF/+;TazF/+* mice at D5 and D10 (left panel). Quantification of PCL and tumor zone (right panel). Scale bar, 100 μm.

Statistical Analysis: Data are presented as mean ± s.d. Significant differences were determined using two tailed, unpaired t-tests (**b**).

**
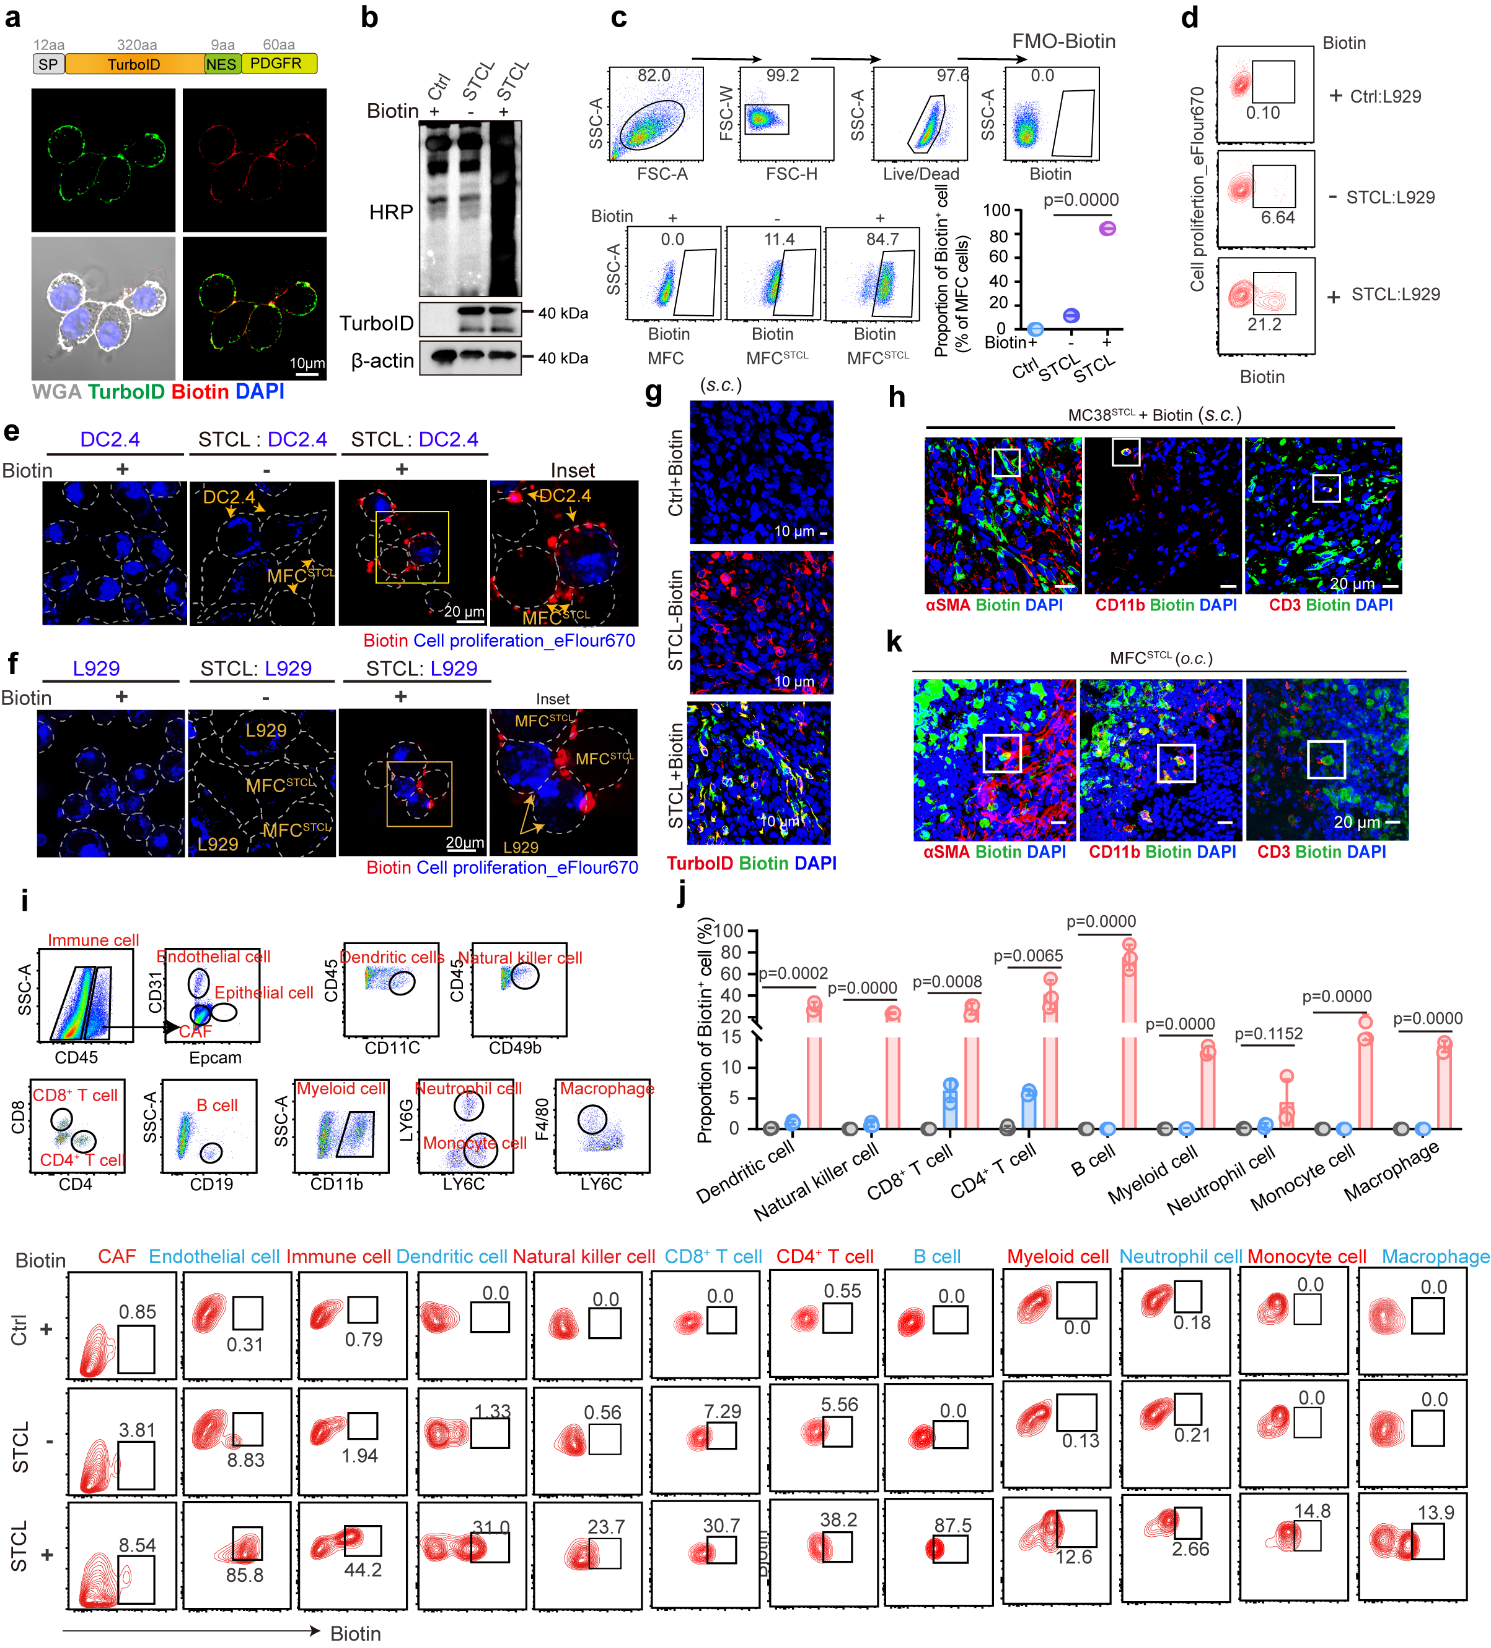
**

**Extended Data Fig. 3 STCL Enables Direct Interaction-Based Labeling *In Vitro* and *In Vivo***

**a.** Genetic fusion of the human PDGFRβ TM domain to the c-terminus of the surface TurboID cassette. Representative images showing both TurboID enzyme and biotinylated signals were well-colocalized with the plasma membrane marker, wheat germ agglutinin (WGA). Scale bar, 10 μm.

**b**, **c.** Western blotting (b) and flow cytometry analysis (c) were used to evaluate *cis* labeling in MFCSTCL cells, consistently revealing TurboID- and biotin-dependent biotinylated signals *in vitro* (n = 3 wells per group).

**d.** Flow cytometry analysis of the proportion of L929 cells in contact with MFCSTCL cells.

**e**, **f.** Representative images illustrating biotinylated signals on the cell surface of both MFCSTCL and MFCSTCL-contacted DC2.4 cells (d) and L929 cells (f) in a biotin-treated co-culture system. Scale bar, 20 μm.

**g**. Representative images of biotinylated signals and TurboID in the subcutaneous tumors formed by parental MC38Ctrl and MC38STCL cells treated with/without biotin. Scale bar: 10 μm.

**h**. Representative images illustrating biotinylated signals on the cell of MFCSTCL, TurboID, Vimentin, CD11b, and CD3 cells in the subcutaneous tumor model. Scale bar, 100 μm.

**i, j**. Flow cytometry analysis of the proportions of each type of immune cells interacted with tumors in the subcutaneous tumor model (i), the proportion of labeled cells were quantified in (j).

**k.** Representative images illustrating biotinylated signals on the cell of αSMA, CD11b, and CD3 in the *o.c.* model. Scale bar, 20 μm.

Statistical Analysis: Data are presented as mean ± s.d (c). Significant differences were determined using two-tailed, one-way ANOVA with Dunnett’s post hoc analysis (i).


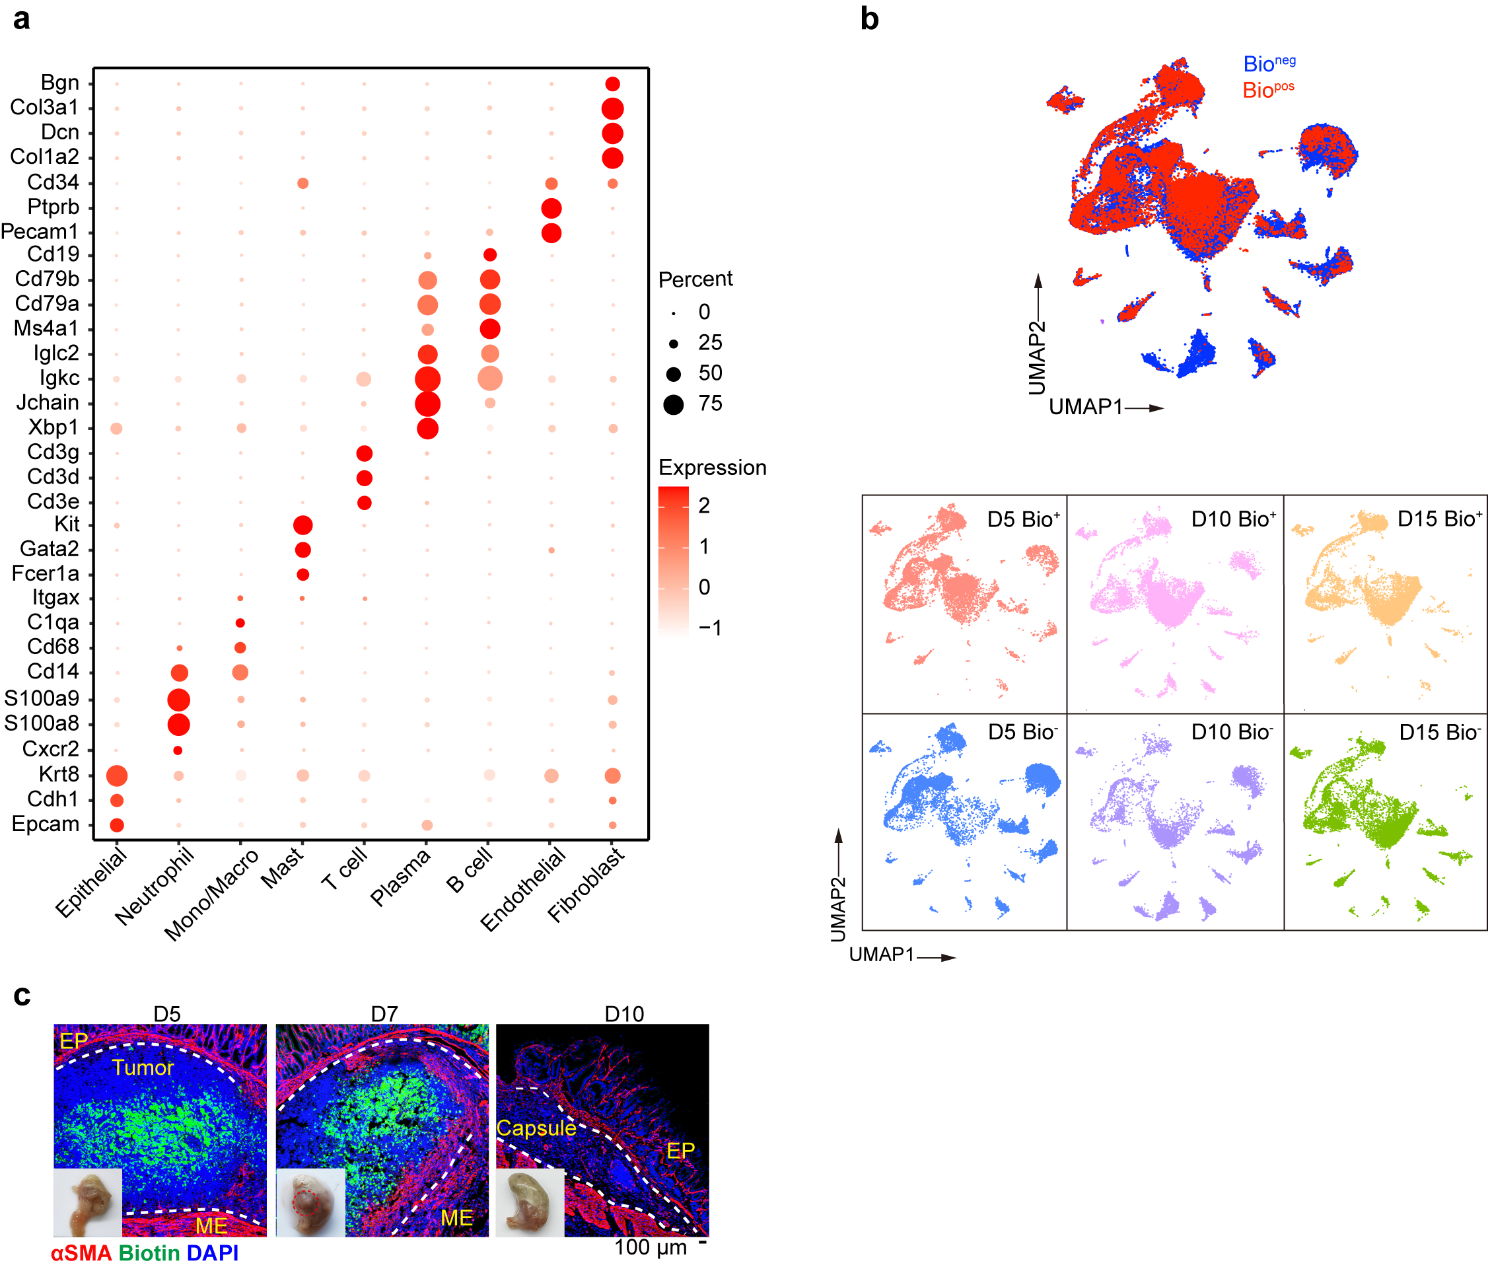


**Extended Data Fig. 4 A Tumor-Suppressive Model**

**a.** Heatmap of characteristic gene of each cluster.

**b.** Uniform Manifold Approximation and Projection (UMAP) plots of cells identified through integrated analysis, showing tumor interacted cells or bystanders, colored by mouse cell type (upper panel).

**c.** Imaging presentation of the tumor-suppressive gastric cancer model and tumor-interacted cells at D5, D10, and D15. Scale bar, 200 μm.


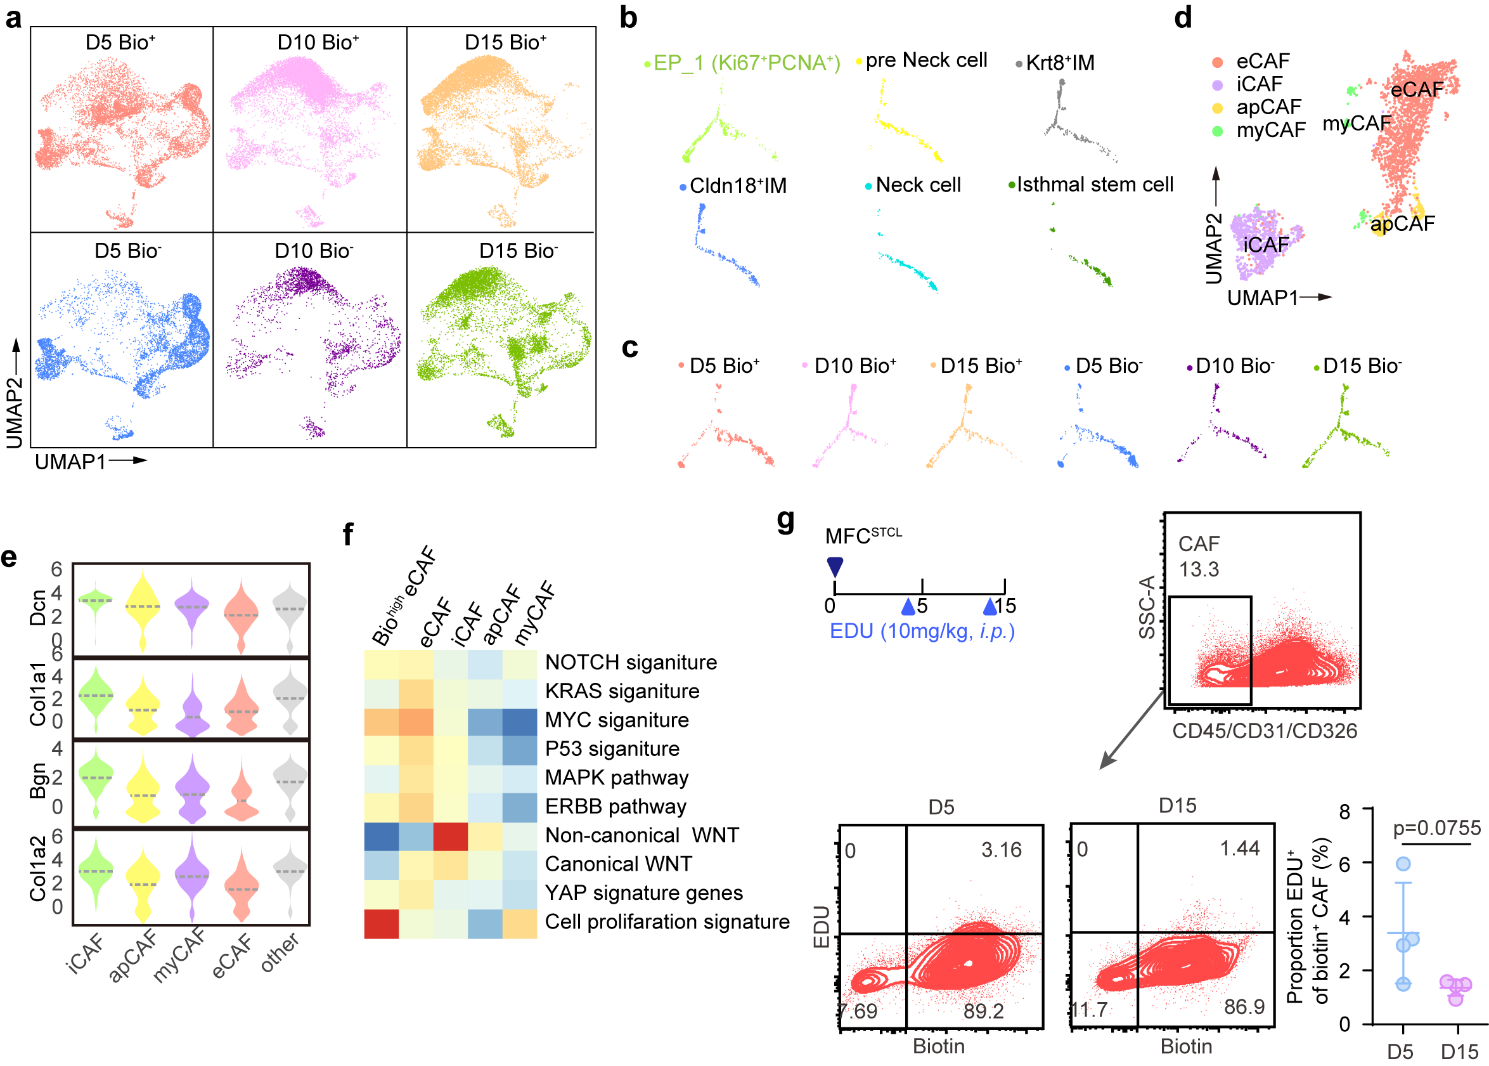


**Extended Data Fig. 5 STCL-scRNA Analysis of Tumor Contactome**

**a**, Uniform Manifold Approximation and Projection (UMAP) plots of tumor-interacted epithelial cells identified by integrated analysis at different time point, colored by mice cell type.

**b**, **c**, Trajectory prediction for the EP_1 cluster (b) and their direct interactions with tumors prior to the transformation of epithelial cells into EP_1 cluster at different time point (c).

**d**, UMAP plot of CAF cells identified by integrated analysis, colored by mice cell type.

**e**, Violin plot of characteristic gene of each CAF cluster. **f**, Heatmap of distinct signatures for each CAF cluster.

**g**, Schematic illustration of the orthotopic gastric cancer (*o.c.*) model. Tumors were harvested after 1 days of intraperitoneal EDU administration (10 mg/kg). Flow cytometry analysis of the proportions of proliferating CAF cells interacting with tumors in the *o.c.* (n = 4 replicates/group).

Statistical Analysis: Data are presented as mean ± s.d. (g).


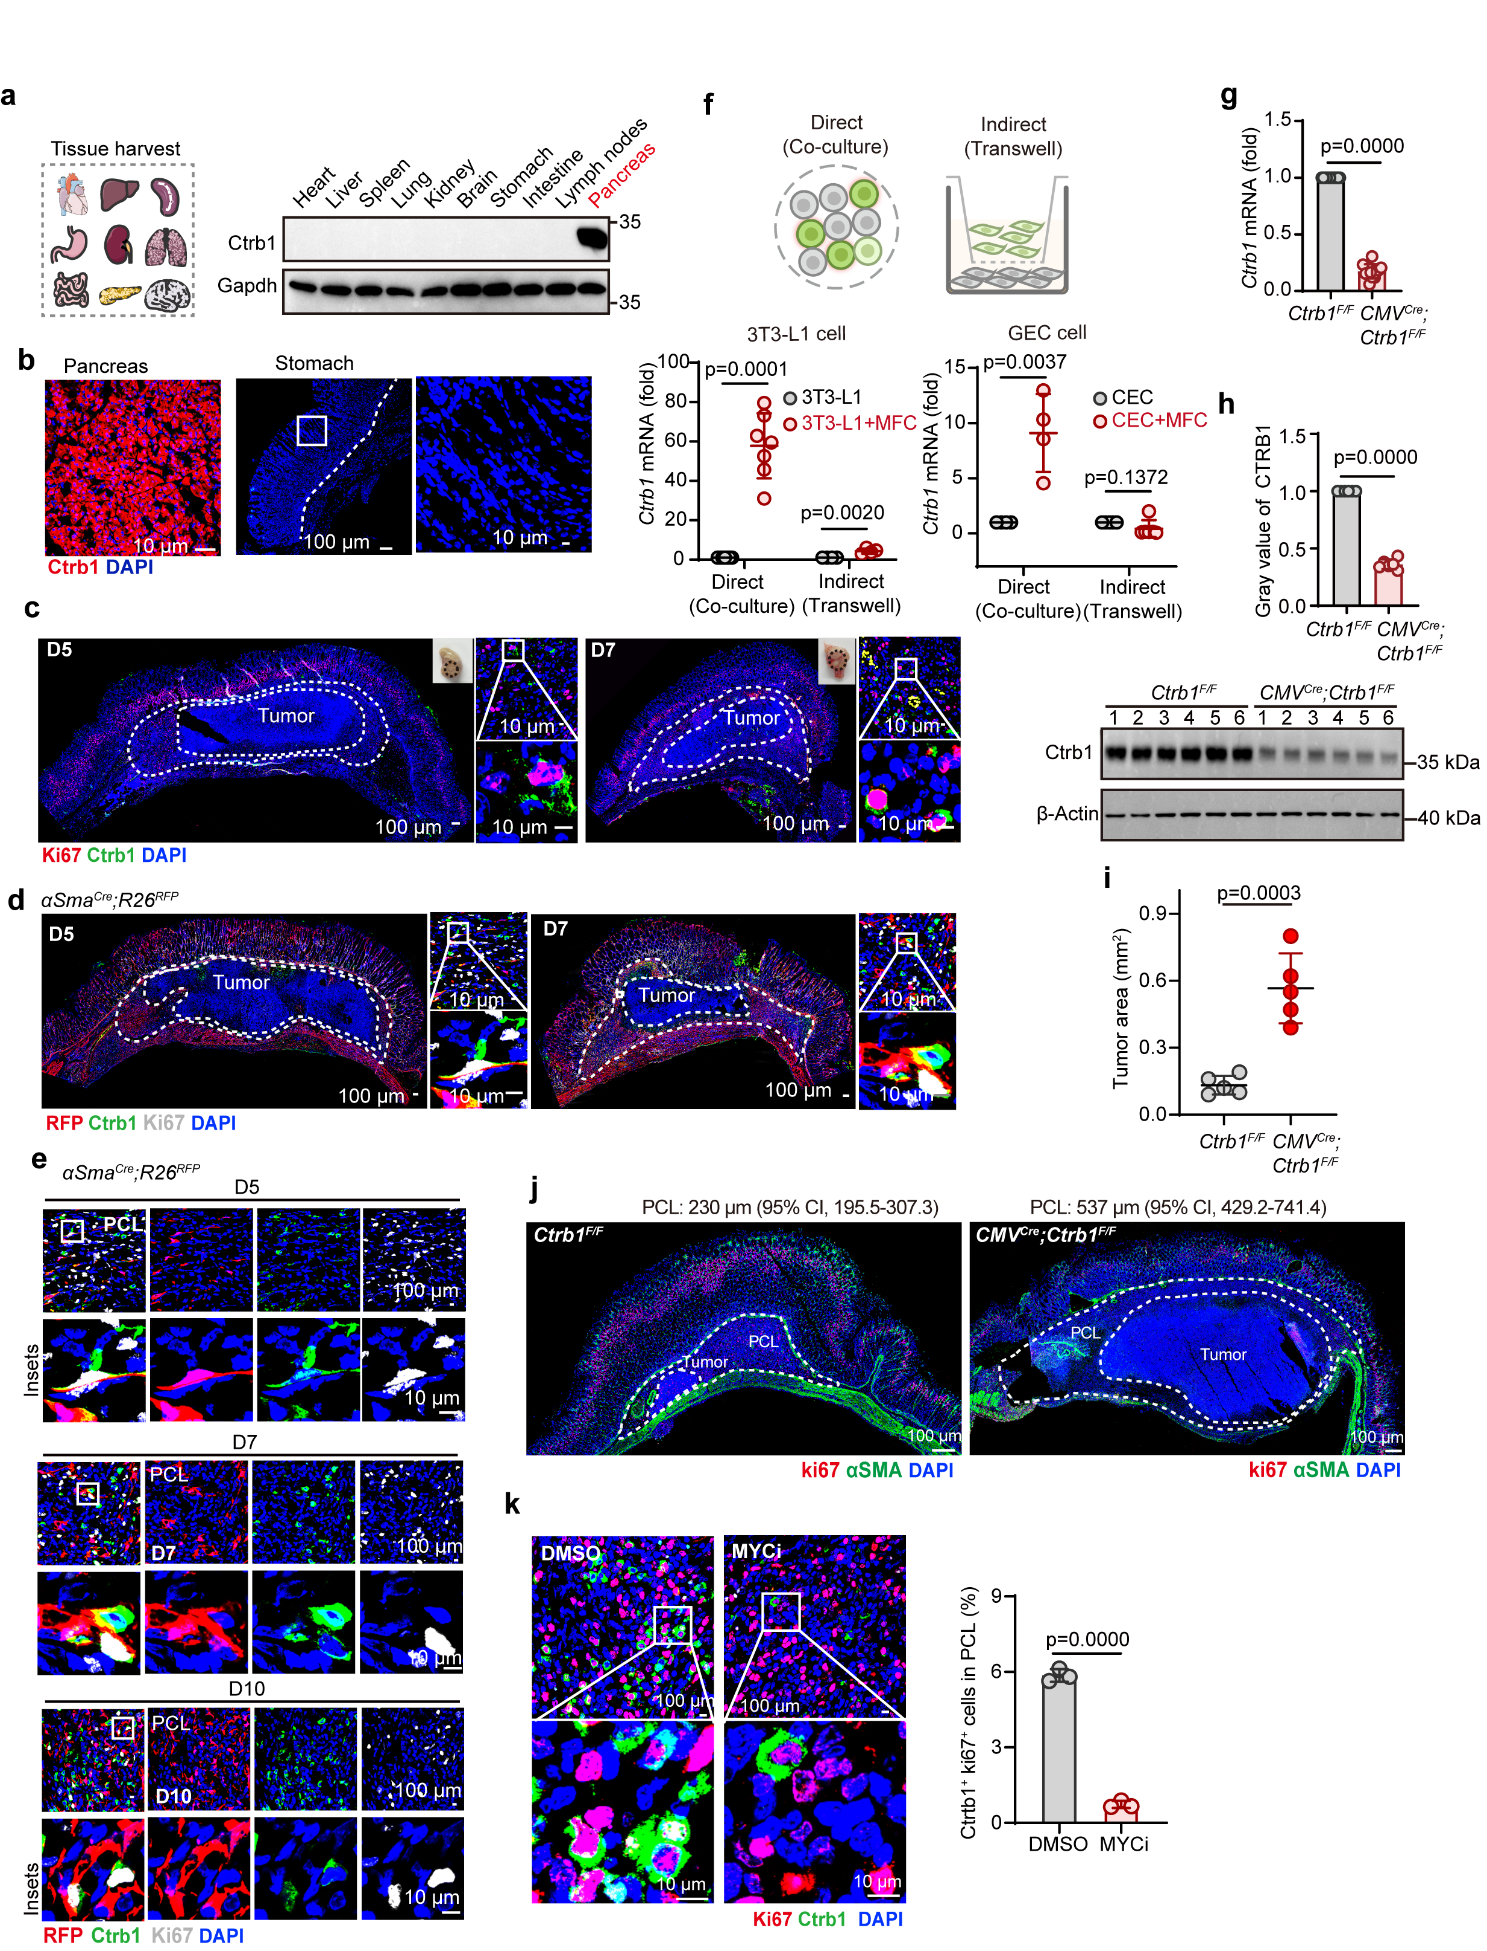


**Extended Data Fig. 6. Identification of CTRB1 as an Essential Factor for ESDAC**

**a.** Schematic diagram showing the collection of various tissues from WT mice for western blot analysis of CTRB1 expression.

**b.** Representative images illustrating Ctrb1 expression in the pancreas and stomach tissue of WT mice. Scale bar, 100 μm.

**c.** Immunostaining of Ki67 expression in whole-stomach tissue with Ctrb1 in the orthotopic gastric cancer (*o.c.*) model at day 5 and day 7. Scale bars, 100 μm and 10 μm.

**d**, **e.** Immunostaining of Ki67 and Ctrb1 expression in whole-stomach tissue (d) and PCL (e) with RFP in the *o.c.* model of *α-SmaCre;R26RFP* mice at day 5, day7, and day 10. Scale bars, 100 μm and 10 μm.

**f.** Schematic illustration depicting the direct and indirect culture of MFC cells with 3T3-L1 and GEC cells—pre-stained with the proliferative dye eFluor670 at a 1:1 ratio (left panel). qPCR analyses the transcription of *ctrb1* in 3T3-L1 (n = 7 and n=4 replicates per group) (middle panel) and GEC cells (n = 4 and n=5 replicates per group) (right panel). The direct data was adopted from Fig 6g.

**g, h.** The knock out efficiency of *CMVCre;Ctrb1F/F* mice were quantified by qPCR and WB (n= 12 and n = 6 replicates per group).

**i.** The tumor area of *Ctrb1F/F* and *CMVCre;Ctrb1F/F* mice were quantified (n= 5 replicates per group).

**j**. Representative images illustrating Ctrb1 expression in the of *CMVCre;Ctrb1F/F* tumor burden mice. Scale bar, 100 μm.

**k.** Representative images and quantification of Ki67+Ctrb1+ cells in PCL of tumor tissues derived from Myc inhibition (n = 3 replication per group). Scale bars, 100 μm and 10 μm.

Statistical Analysis: Data are presented as mean ± s.d. Significant differences were determined using two tailed, one-way ANOVA with Dunnett’s post hoc analysis (f) or unpaired t-test (g).


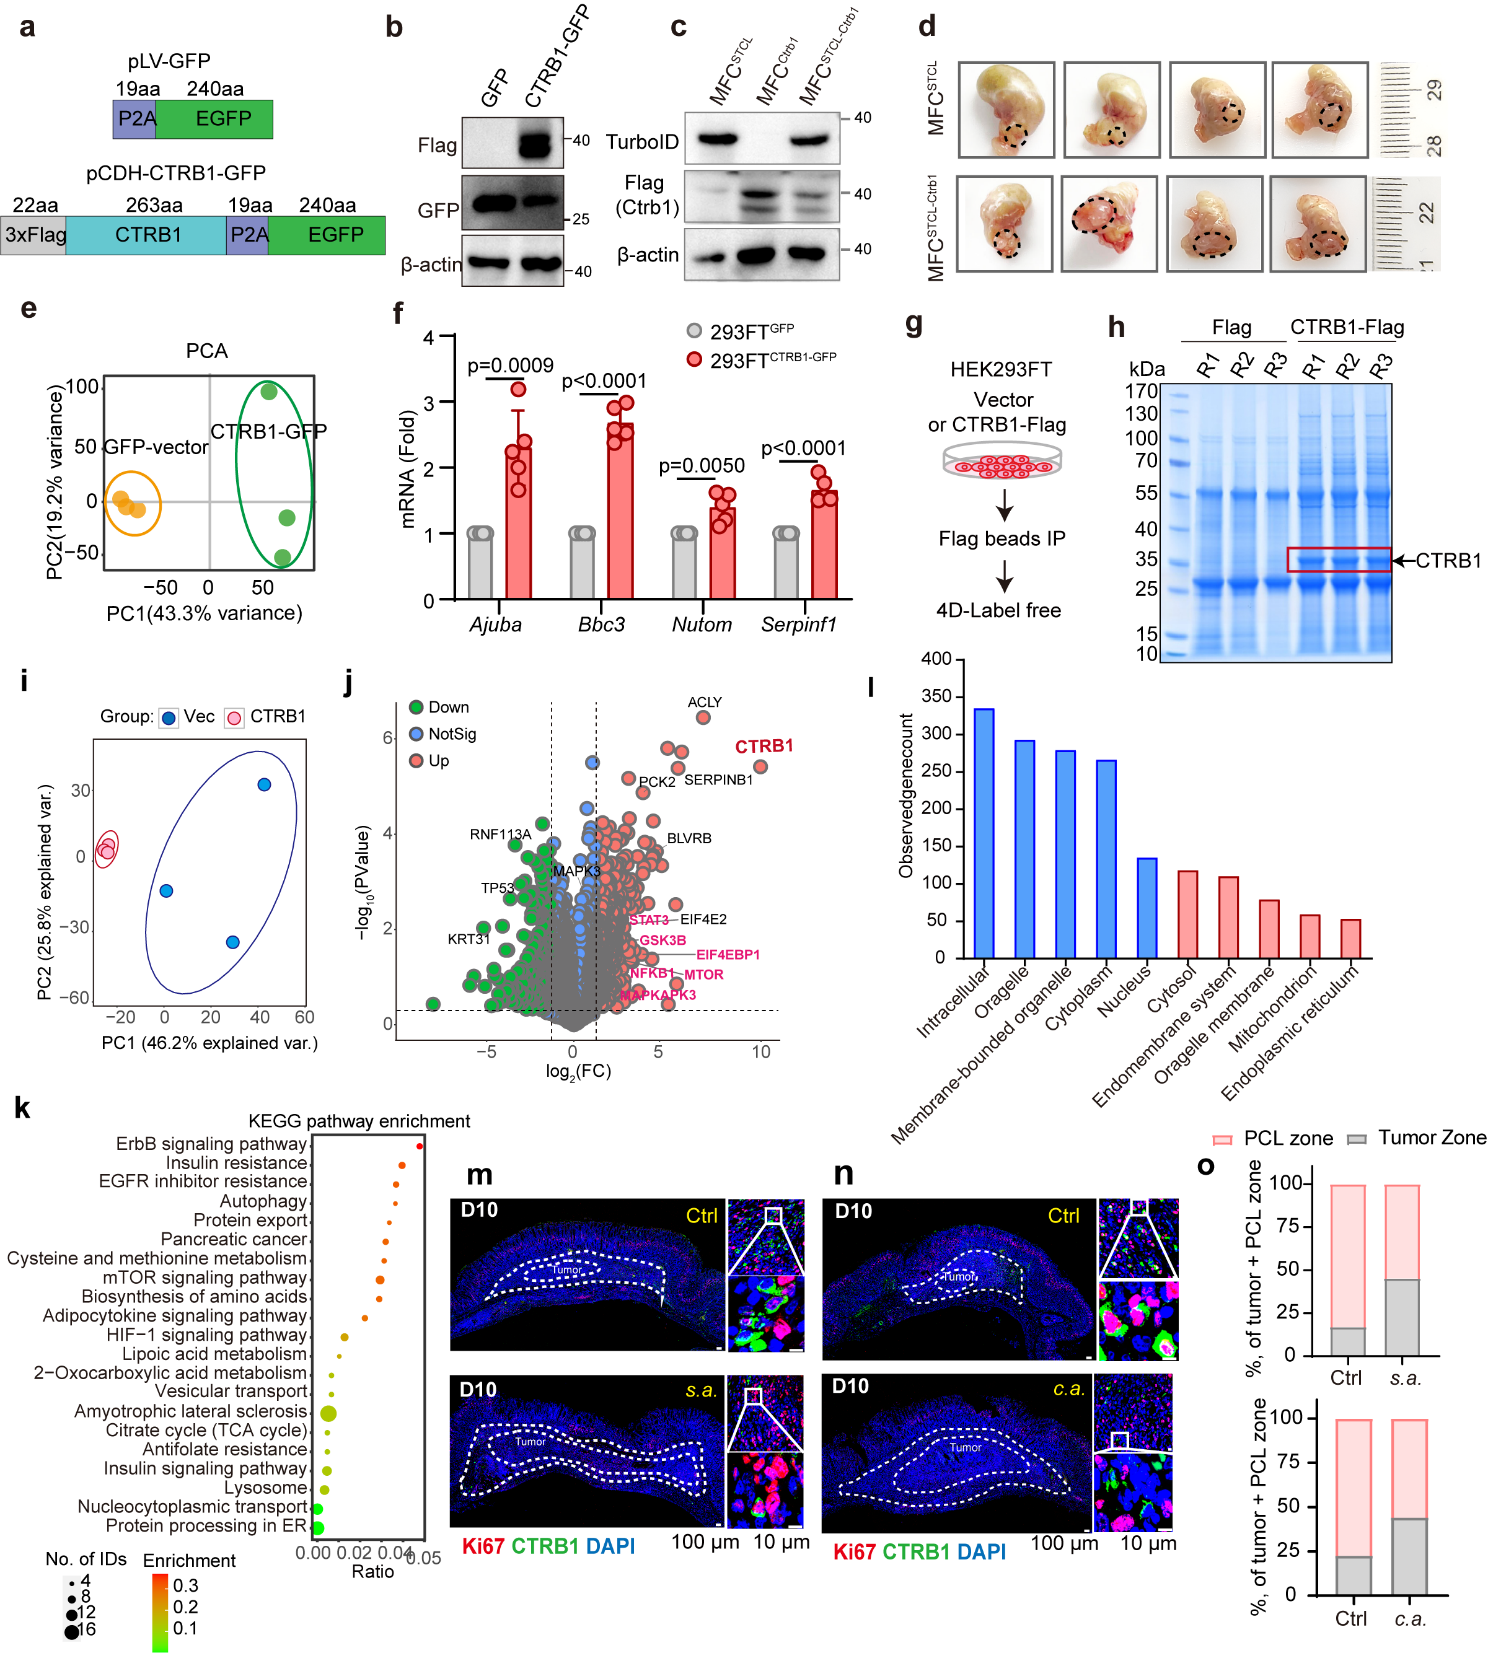


**Extended Data Fig. 7 Ctrb1 Confers Cell Fitness via Boosting Multiple Proliferating Pathways**

**a**, A schematic illustration showing the GFP-tagged CTRB1 expression cassette (left panel) and a western blot analysis of its expression (right panel).

**b**, Western blot analysis of CTRB1 expression in 293FTGFP and 293FTCTRB1-GFP stable cell lines.

**c**, Western blot analysis of Ctrb1 expression in MFCSTCL, MFCCTRB1, and MFCSTCL-CTRB1 stable cell lines.

**d**, Representative photographs showing GC tumors derived from MFCSTCL and MFCSTCL-CTRB1.

**e**, Principal component analysis (PCA) biplot depicting the relationship between the 293FTGFP and 293FTCTRB1-GFP. The axis labels show that PC1 explains 43.3% of the total variance, and PC2 explains 19.2%.

**f**. qPCR analysis the transcription of genes in 293FTGFP and 293FTCTRB1-GFP stable cell lines (n = 5 replicates per group).

**g**, A schematic illustration depicting the overexpression of CTRB1-Flag and Vector in HEK293 FT cells for 4D-Lable free assay.

**h**, Coomassie Brilliant Blue staining to detect CTRB1-Flag and Vector overexpression (n=3 biological replicates/group).

**i**, Principal component analysis (PCA) biplot depicting the relationship between the Vector and CTRB1-Flag. The axis labels show that PC1 explains 46.2% of the total variance, and PC2 explains 25.8%.

**j**, Volcano plot depicting CTRB1 interacted genes in CTRB1-Flag group (n=3 replicates/group).

**k**, KEGG analysis revealing multiple pathways enriched in the CTRB1 interacted genes from panel (i). **l**, Subcellular localization of CTRB1 interacted Proteins suggests CTRB1 function primarily near organelle membranes.

**m-n**, Immunostaining of Ki67 in whole-stomach tissue with Ctrb1 in the *o.c.* model after *S. anginosus* and *C. albicans* gavage. Scale bars, 100 μm and 10 μm.

**o**, Quantification of PCL and tumor zone in tumor tissues after *S. anginosus* and *C. albicans* gavage.

Statistical Analysis: Data are presented as mean ± s.d. Significant differences were determined using two tailed, one-way ANOVA with Dunnett’s post hoc analysis (e).


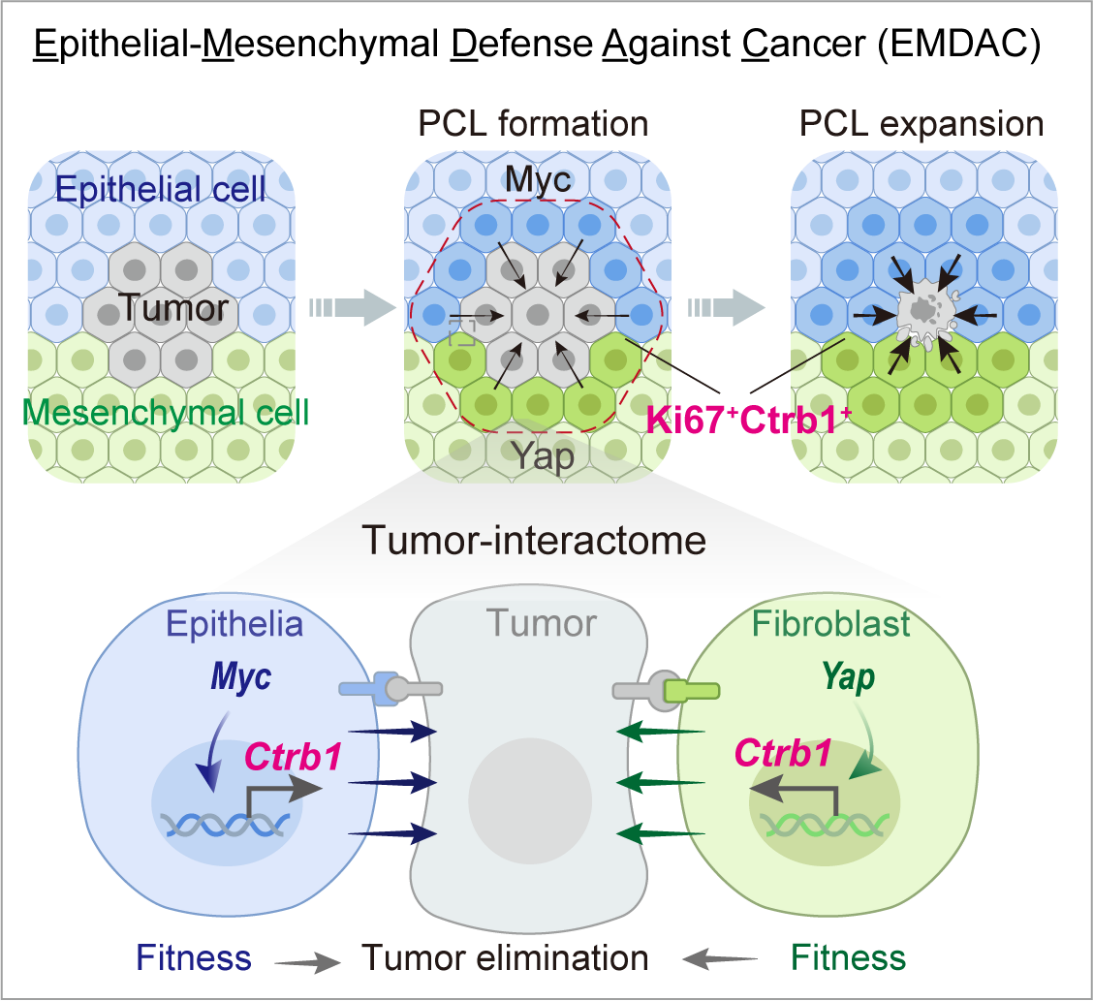


**Extended Data Fig. 8 A working model for this study**

Direct tumor cell contact activates a unique epithelial-stromal anticancer defense (EMDAC) program, wherein the epithelium and stroma, through direct interaction with tumor cells, establish a proliferation containment layer (PCL) architecture. Within this structure, PCL components collectively enhance their proliferative capacity via the chymotrypsinogen B1 (CTRB1)-mediated Myc/Yap signaling axis, ultimately facilitating tumor elimination.

**Supplementary table 1**. List of primers for mouse genotyping

| Mice name | Primer 1 | Primer 2 | Primer 3 | Primer 4 |
| --- | --- | --- | --- | --- |
| *Yap1Flox/+* | CCATTGTCCTCATCTCTTACTAAC | GATTGGGCACTGTCAATTAATGGGCTT | CAGTCTGTAACAACCAGTCAGGGATAC |  |
| *TazFlox/+* | GCCAAGAGTAGAGGACCTAGAGAGC | GGAAGCCTGTACCAGTGTCACAAAT |  |  |
| *aSMACre* | GCCTGCATTACCGGTCGATGC | GCATGATCTCCGGTATTGAAACT |  |  |
| *R26-RFPLSL* | AAGGGAGCTGCAGTGGAGTA | CCGAAAATCTGTGGGAAGTC | GGCATTAAAGCAGCGTATCC | CTGTTCCTGTACGGCATGG |
| *CTRB1Flox/+* | GCAGAGAGCCTCAAAATGACAC | TCCCCTGGAAACATTGGGTC |  |  |
| *Claudin18.2Cre/ERT2* | CTTCAAACACTGAACTGTCCCCT | GACTGTCTAGCCTCCCTATGGATG | CTTCAAACACTGAACTGTCCCCT | TAGAGTCCAGATCTTCCGGGTAC |

**Supplementary table 2**. List of primers for PCR

| Plasmid name | Forward primer | Reverse primer |
| --- | --- | --- |
| pLV-Sur-TurboID(1-321)-NES-PDGFR | Myc-TurboID-F: CGACGCGTTATCCATATGACGTTCCAGATTACGCTGCTCAGTGCagcaaagacaatactgtgcctct | Myc-TurboID-R:  GCGTGTCCTGGCCCACAGCAGAGCCGTCCAGGGTCAGGCGCTC |
| TurboID-NES-PDGFR-F: GTCTGCGGTCTGCCGAAAAGCTGCAGCTGCCTCCCCTGGAGCGCCTGACCCTGGACGGCTCTGCTGTGGGCCAGGACACGCA | TurboID-NES-PDGFR-F:  CCGGAATTCTTAGTCACGTGGCTTCTTCTGCC |
| pCDH-CTRB1-Flag | GGGAATTCATGGCTTCCCTCTGGCTCCTCTCC | CCGCCTCGAGGTTGGCAGCCAGGATCTTCTGCAC |
| pCDH-CTRB1-Flag-P2A-EGFP | CTRB1-F: CATTGTGTCCTGCGGCAGCGACACCTGCTCCA | CTRB1-R:  GTGTCGCTGCCGCAGGACACAATGCCCACCAG |
| CTRB1-P2A-EGFP-F:  AGAAGATCCTGGCTGCCAACGCTACTAACTTCAGCCTGCT | CTRB1-P2A-EGFP-R:  ATAAGAATGCGGCCGCTTACTTGTACAGCTCGTCCA |

**Supplementary table 3**. List of primers for chip-seq

| Gene name | Forward primer | Reverse primer |
| --- | --- | --- |
| *Myc* | F1: CTGTGTCCAAGAATGTGC | R1: CCCAAGTGCTGGGATTA |
| F2: ATTTCCTGCTCGTGTGTT | R2: GCATTTACTTATGGGGGTT |
| F3: CTGGGGTTCCAAACTGT | R3: GAGCACTGGTTGCTCTT |
| *TEAD* | F1: CTGTGTGGCTGAGTGTG | R1: CTCTCTTCTGCCCTCTGA |
| F2: TGCCTGTCCACAGGACA | R2: GGAACACACGAGCAGGA |
| F3: CTGATTCTCCTGCTTCC | R3: TTGGGTCCAGCTCCCACCA |

**Supplementary table 4**. List of key resources

| REAGENT or RESOURCE | SOURCE | IDENTIFIER/DILUTION |
| --- | --- | --- |
| Antibodies | | |
| Rabbit Polyclonal anti-BirA (mutated/TurboID) | Agrisera AB | Cat# AS20 4440; 1/1000 |
| Peroxidase-conjugated Streptavidin | Yeasen | Cat# 35105ES6; 1/2000 |
| Alexa Fluor® 488 Streptavidin | Biolegend | Cat# 405235; 1/200 |
| Streptavidin, Alexa Fluor™ 700 conjugate | Thermo Fisher Scientific | Cat# S21383; 1/200 |
| Alexa Fluor® 647 Streptavidin | Biolegend | Cat# 405237; 1/200 |
| Anti-alpha smooth muscle Actin antibody [1A4] | Abcam | Cat# ab7817; 1/100 |
| Mouse anti-Vimentin | BD Biosciences | Cat# 550513; 1/100 |
| Mouse Anti-Human CD31 | BD Biosciences | Cat# 550389; 1/100 |
| Mouse Anti-Rat CD4 | BD Biosciences | Cat# 550296; 1/100 |
| Biotin anti-mouse F4/80 | Biolegend | Cat# 123106; 1/100 |
| Streptavidin, Alexa Fluor™ 700 conjugate | Thermo Fisher Scientific | Cat# S21383; 1/100 |
| APC/Cyanine7 anti-mouse CD45.2 | Biolegend | Cat# 109824; 1/100 |
| PE anti-mouse CD8a Antibody | Biolegend | Cat# 100707; 1/100 |
| PerCP anti-mouse CD4 Antibody | Biolegend | Cat# 100431; 1/100 |
| APC anti-mouse CD326 (Ep-CAM) Antibody | Biolegend | Cat# 118213; 1/100 |
| PE anti-mouse CD31 (PECAM-1) Antibody | Biolegend | Cat# 160203; 1/100 |
| FITC anti-mouse CD45 Antibody | Biolegend | Cat# 157213; 1/100 |
| Mouse anti-CTRB1/2 | Santa cruz | Cat# sc-398721; 1/100 |
| Goat anti-RFP | Sicgen | Cat# AB8181-200; 1/100 |
| Rabbit polyclonal anti-Ki67 | Abcam | Cat# ab15580; 1/100 |
| Anti-Cytokeratin 8 Mouse Monoclonal Cytoskeleton Marker Antibody | HUABIO | Cat# M1603-2; 1/100 |
| Mouse monoclonal anti-alpha smooth muscle Actin | Abcam | Cat# ab7817; 1/100 |
| Mouse monoclonal anti-Vimentin | Santa cruz | Cat# sc-6260; 1/100 |
| Rabbit monoclonal anti-CD3 epsilon | Abcam | Cat# ab16669; 1/100 |
| Mouse monoclonal anti-CD4 | Santa cruz | Cat# sc-19641; 1/100 |
| Rabbit monoclonal anti-CD31 | Cell signaling technology | Cat# 77699; 1/100 |
| Rabbit monoclonal anti-CD11b | HUABIO | Cat# HA722075; 1/100 |
| Mouse monoclonal anti-FLAG® M2 antibody | Sigma-Aldrich | Cat# F1804; 1/1000 |
| Anti-GFP antibody | Abcam | Cat# ab290; 1/1000 |
| Anti-c-Myc antibody | Abcam | Cat# ab32072; 1/1000 |
| Anti-TEAD4 antibody | Abcam | Cat# ab308621; 1/1000 |
| Donkey anti-Goat IgG (H+L) Highly Cross-Adsorbed Secondary Antibody, Alexa Fluor™ 647 | Thermo Fisher Scientific | Cat# A-21447; 1/1000 |
| Goat anti-Rabbit IgG (H+L) Highly Cross-Adsorbed Secondary Antibody, Alexa Fluor™ 488 | Thermo Fisher Scientific | Cat# A-11008; 1/1000 |
| Goat anti-Mouse IgG (H+L) Cross-Adsorbed Secondary Antibody, Alexa Fluor™ 568 | Thermo Fisher Scientific | Cat# A-11004; 1/1000 |
| Goat anti-Rabbit IgG (H+L) Highly Cross-Adsorbed Secondary Antibody, Alexa Fluor™ 568 | Thermo Fisher Scientific | Cat# A-11011; 1/1000 |
| Goat anti-Mouse IgG (H+L) Cross-Adsorbed Secondary Antibody, Alexa Fluor™ 488 | Thermo Fisher Scientific | Cat# A-11001; 1/1000 |
|  |  |  |
| Chemicals | | |
| Biotin | Sigma-Aldrich | Cat# 58-85-5 |
| Tamoxifen | Sigma-Aldrich | Cat# T5648 |
| Thioglycolic acid sodium | Sigma-Aldrich | Cat# 367-51-1 |
| DAPI | Sigma-Aldrich | Cat# D9542 |
| Collagenase II | Sigma-Aldrich | Cat# C6885 |
| DNase I | Roche | Cat# 11284932001 |
| WHEAT GERM AGGLUTININ (Alexa Fluor 488) | Thermo Fisher Scientific | Cat# W11261 |
| WHEAT GERM AGGLUTININ (Alexa Fluor 594) | Thermo Fisher Scientific | Cat# W11262 |
| WHEAT GERM AGGLUTININ (Alexa Fluor 647) | Thermo Fisher Scientific | Cat# W32466 |
| eBioscience™ Cell Proliferation Dye eFluor™ 670 | Invitrogen | Cat# 65-0840-90 |
| Red blood cell lysate | TIANGEN | Cat# RT122-02 |
| Polyethylenimine Linear(PEI) | Thermo Fisher Scientific | Cat# 31985070 |
| Anti-Biotin MicroBeads UltraPure | Miltenyi Biotec | Cat# 130-090-485 |
| Anti-DYKDDDDK IP Resin | GenScript | Cat# L00425 |
| LIVE/DEAD™ Fixable Yellow Dead Cell Stain Kit | Thermo Fisher Scientific | Cat# L34959 |
| Fixation/Permeablization Kit | BD Bioscience | Cat# 554714 |
| Yefluor 488 EdU Imaging Kit Yefluor 488 EdU | Yeasen | Cat# 40275ES60 |
| 5-FU (5-Fluorouracil) | Selleck | Cat# S1209 |
|  |  |  |
| Critical commercial assays | | |
| qPCR SYBR Green Master Mix | Yeasen | Cat# 11201ES03 |
| RNA Isolater Total RNA Extraction Reagent | Vazyme Biotech | Cat# R401-01 |
| HiScript II 1st Strand cDNA Synthesis Kit | Vazyme Biotech | Cat# R212-01 |
| Hyperactive Universal CUT&Tag Assay Kit | Vazyme Biotech | Cat# TD903 |
| Hyperactive pG-MNase CUT& RUN Assay Kit | Vazyme Biotech | Cat# HD101 |
| Hematoxylin-Eosin (H&E) Stain Kit | Solarbio | Cat# G1120 |
| Periodic Acid Schiff (PAS) Stain Kit | Solarbio | Cat# G1281 |
|  |  |  |
| Experimental models: Organisms/Strains | | |
| Mouse: *SmaCre* | Provided by G. Wang | N/A |
| Mouse: *R26-RFPLSL* | Provided by B. Zhou | N/A |
| Mouse: *Ctrb1Flox/+* | Shanghai Model Organisms | N/A |
| Mouse: *Claudin18.2Cre/ERT2* | GemPharmatech | Strain# T056749 |
| Mouse: *Yap1Flox/+* | (Tang et al., 2020) | N/A |
| Mouse: *TazFlox/+* | (Tang et al., 2020) | N/A |
| Mouse: *CMVCre* | Jackson Lab | Strain# 006045 |
| Mouse: *Mist1Cre/ERT2* | Jackson Lab | Strain# 029228 |
| Software and algorithms | | |
| GraphPad Prism 9 Software | GraphPad | http://www.graphpad.com |
| Imaris Software | Oxford Instruments | https://imaris.oxinst.com |
| ImageJ Software | National Institutes of Health | https://imagej.nih.gov/ij |
| FlowJo Software | Treestar | https://www.flowjo.com |
| AutoCAD | Autodesk | https://www.autodesk.com |
|  |  |  |

**Supplementary table 5**. List of primers for qPCR

| Gene name | Forward primer | Reverse primer |
| --- | --- | --- |
| *Ctrb1* | F: TCTGTCCAGGATCGTCAACGGA | R: CCACCCAGTTTTCGCTGATGAG |
| *Ctgf* | F: TGCGAAGCTGACCTGGAGGAAA | R: CCGCAGAACTTAGCCCTGTATG |
| *Cyr61* | F: GTGAAGTGCGTCCTTGTGGACA | R: CTTGACACTGGAGCATCCTGCA |
| *Ajuba* | F: CACCTGTATCAAGTGCAACAAAGG | R: GACGCTGTAGAAAGCCTTGCAC |
| *Bbc3* | F: ACCGCTCCACCTGCCGTCAC | R: ACGGGCGACTCTAAGTGCTGC |
| *Myc* | F: CGCTCCAGTTTCCTGAACCTCA | R: ACCAGGAGCTTGGACTCATCAG |
| *Cdk4* | F: CATACCTGGACAAAGCACCTCC | R: GAATGTTCTCTGGCTTCAGGTCC |
| *Cdk4* | F: ACCTCTGGAGTGTCGGTTGCAT | R: TTCCTCTCCTGGGAGTCCAATG |
| *Actin* | F: CATTGCTGACAGGATGCAGAAGG | R: TGCTGGAAGGTGGACAGTGAGG |

**References**

An, L., Dong, C., Li, J., Chen, J., Yuan, J., Huang, J., Chan, K., Yu, C., and Huen, M. (2018). RNF169 limits 53BP1 deposition at DSBs to stimulate single-strand annealing repair. Proceedings of the National Academy of Sciences of the United States of America *115*, E8286-E8295.

An, L., Nie, P., Chen, M., Tang, Y., Zhang, H., Guan, J., Cao, Z., Hou, C., Wang, W., Zhao, Y.*, et al.* (2020). MST4 kinase suppresses gastric tumorigenesis by limiting YAP activation via a non-canonical pathway. J Exp Med *217*.

Coluccia, A.M.L., Vacca, A., Duñach, M., Mologni, L., Redaelli, S., Bustos, V.H., Benati, D., Pinna, L.A., and Gambacorti‐Passerini, C. (2007). Bcr‐Abl stabilizes β‐catenin in chronic myeloid leukemia through its tyrosine phosphorylation. The EMBO Journal *26*, 1456-1466-1466.

Haghverdi, L., Lun, A., Morgan, M., and Marioni, J. (2018). Batch effects in single-cell RNA-sequencing data are corrected by matching mutual nearest neighbors. Nature biotechnology *36*, 421-427.

Jiao, S., Wang, H., Shi, Z., Dong, A., Zhang, W., Song, X., He, F., Wang, Y., Zhang, Z., Wang, W.*, et al.* (2014). A peptide mimicking VGLL4 function acts as a YAP antagonist therapy against gastric cancer. Cancer Cell *25*, 166-180.

Ma, L., Hernandez, M., Zhao, Y., Mehta, M., Tran, B., Kelly, M., Rae, Z., Hernandez, J., Davis, J., Martin, S.*, et al.* (2019). Tumor Cell Biodiversity Drives Microenvironmental Reprogramming in Liver Cancer. Cancer cell *36*, 418-430.e416.

Meng, Y., Sang, Y., Liao, J., Zhao, Q., Qu, S., Li, R., Jiang, J., Wang, M., Wang, J., Wu, D.*, et al.* (2022). Single cell transcriptional diversity and intercellular crosstalk of human liver cancer. Cell death & disease *13*, 261.

Meng, Y., Zhao, Q., Sang, Y., Liao, J., Ye, F., Qu, S., Nie, P., An, L., Zhang, W., Jiao, S.*, et al.* (2023). GPNMB Gal-3 hepatic parenchymal cells promote immunosuppression and hepatocellular carcinogenesis. The EMBO journal *42*, e114060.

Tang, Y., Fang, G., Guo, F., Zhang, H., Chen, X., An, L., Chen, M., Zhou, L., Wang, W., Ye, T.*, et al.* (2020). Selective Inhibition of STRN3-Containing PP2A Phosphatase Restores Hippo Tumor-Suppressor Activity in Gastric Cancer. Cancer Cell *38*, 115-128 e119.

Xie, X., Shi, Q., Wu, P., Zhang, X., Kambara, H., Su, J., Yu, H., Park, S., Guo, R., Ren, Q.*, et al.* (2020). Single-cell transcriptome profiling reveals neutrophil heterogeneity in homeostasis and infection. Nature immunology *21*, 1119-1133.

Zhang, H., Lin, M., Dong, C., Tang, Y., An, L., Ju, J., Wen, F., Chen, F., Wang, M., Wang, W.*, et al.* (2021). An MST4-pbeta-Catenin(Thr40) Signaling Axis Controls Intestinal Stem Cell and Tumorigenesis. Adv Sci (Weinh) *8*, e2004850.
